# Supplementary material for: Training and Testing Healthcare Models using Machine Learning Graphical User Interface Development Environment (ML-GUIDE) Software
Source: Research Square preprint supplement (doi:10.21203/rs.3.rs-8255495/v1), 2025-12-12
Supplement: Supplementary file 1 [file 789b294149b3e99c0aaeafe0.docx]

**Appendix 1**

**Definitions**

## Artificial Intelligence (AI)

It is defined as the science of creating intelligent machines to mimic human intelligence for doing routine tasks.

## Algorithm

An algorithm is a sequence of well-defined instructions provided to the computer to solve specific tasks or problems more efficiently and effectively.

## Data

1. **High Dimensional Data–**A dataset with more features than its sample size.
2. **Data Augmentation–** Data augmentation is a method to artificially increase the size of the data by generating new samples from the existing data using random geometrical transformations such as flip, crop, and rotate.
3. **Meta-data–**The data of data. Metadata refers to data that provides information about other data. It offers context, structure, and additional details that help describe, interpret, or manage a set of data. Metadata can encompass various attributes, such as the source, format, creation date, authorship, or any other characteristics that aid in understanding and utilising the associated data.

## Data Annotation

## Data annotation is a process of labelling information to the data. The practice is helpful for supervised learning where the user tags the output (Diseased or Non-diseased) to the data so that the algorithm can map the input data to these output labels.

## Feature Encoding

Feature encoding converts non-numeric values in categorical features (e.g., Gender) to numerical values. The method confirms that algorithms perform mathematical calculations on non-numerical data.

## Feature Scaling

Feature scaling is a technique of normalising and standardising the data to bring values of all the features to the same range. The process ensures that the machine learning algorithm does not emphasise features with large numerical values and ignores features with smaller values. After feature scaling, all the features come into the same range of values.

**Hyperparameters**

Hyperparameters (such as learning rate, epochs, number of nodes, batch size) are the parameters whose configurations are external to the model___values are setbefore the training begins as it controls the learning process of an algorithm. They directly impact the final performance of the trained model.

**Machine Learning (ML)**

Machine learning is a field of AI that gives a computer the ability to learn from the data on its own without being explicitly programmed. It is primarily segregated into two broad categories named supervised and unsupervised learning.

1. **Supervised Learning** is a modelling technique that trains a model by providing the training samples' output. The primary requirement for this kind of modelling is the labelling of data.

**Classification and Regression**

1. **Classification–** Classification is a supervised machine learning method in which the model maps the input values to the discrete class labels such as cured or not cured.
2. **Regression–** Regression is a supervised machine learning technique in which the model maps the input values to the continuous output variables such as time taken to recover.
3. **Unsupervised Learning** is the type of learning where the model is given unlabeled data to learn from the underlying patterns in the data without any supervision.

## Model Bias and Variance

1. **Bias–** The inability of a machine learning model to capture the true relationship between the training samples.
2. **Variance–** The difference between a machine learning model's performances on different datasets.

## Model Efficiency and Effectiveness

Efficiency is defined as accomplishing desired performance with the least time, money, and effort. Effectiveness is defined as the ability of the model to produce specified and accurate results.

## Model Training and Testing

1. **Model Training–** It is the process where a machine learning algorithm determines the best combination of weights and bias from the labelled data to make accurate predictions.
2. **Model Testing–** It is the process of testing the performance of a machine learning algorithm on the data unseen during the training phase.

## Model weights

Model weights are all the model's parameters (including trainable and non-trainable).It includes the parameters used in every layer of the model.

## Valid and Reliable ML models

A valid and reliable machine learning model is a model which is trustworthy and performs consistently well on unseen data.

**Appendix 2**

**Feature encoding**

It is the process of converting categorical or non-numeric data into a numerical format that machine learning algorithms can understand. It is a crucial step in data preprocessing when working with machine learning models, as ML algorithms require numerical input.

Following are the Feature Encoding methods are available in the ML-GUIDE software:

1. **One-Hot Encoding:** One-Hot Encoding is a method where categorical data is converted into a binary matrix (1s and 0s). For each category, a new binary column (or "dummy" column) is created, and the presence of the category is marked with a 1 in the respective column. For example, consider a dataset with a "Color" column containing categories like Red, Blue, and Green. After one-hot encoding, this column is transformed into three binary columns: "Red," "Blue," and "Green," with 1s and 0s indicating the presence or absence of each color.
2. **Label Encoding:** Label Encoding involves assigning a unique numerical label to each category. Each category is represented by an integer, and the order of the labels may imply an ordinal relationship between the categories. For example, in a "Size" column with categories Small, Medium, and Large, label encoding assigns them numerical labels, such as 0 for Small, 1 for Medium, and 2 for Large. The model may interpret these labels as having an ordinal relationship, which might be appropriate in this case.

**Appendix 3**

**Feature Selection**

Feature selection is the process of choosing a subset of relevant and significant features from the original set of features in a dataset. The goal is to improve model performance by reducing dimensionality, mitigating the risk of overfitting, and enhancing interpretability.

Following are the Feature Selection methods are available in the ML-GUIDE software:

**Variance Thresholding:**Variance thresholding is a technique that removes features with low variance. Features with little variation across the dataset may not provide much information and can be considered less informative for predictive modeling. By setting a variance threshold, features with variance below that threshold are removed.

**SelectKBest:**SelectKBest is a method that selects the top “k” features based on univariate statistical tests. It evaluates each feature independently and scores them according to their statistical significance in relation to the target variable. For example, in a classification task, SelectKBest might use a chi-squared test to score each feature's relevance to the target variable. It then selects the top “k” features with the highest scores for inclusion in the model.

**Recursive Feature Elimination using Cross-Validation (RFECV):** Recursive Feature Elimination (RFE) is an iterative method that recursively removes the least important features until the desired number of features is reached. RFECV extends this by using cross-validation to find the optimal number of features. For example,in a regression problem, RFECV might start with all features, fit the model, and eliminate the least important feature. It repeats this process until the model's performance, evaluated through cross-validation, is optimised with the chosen subset of features.The algorithm doesn't require the user to specify a desired number of features in advance. Instead, it automatically selects the number of features that results in the highest cross-validated performance.

**Appendix 4**

**­**

Fig A1- Total number of Classifiers in ML-GUIDE = 25

Fig A2- Total number of Classifiers in ML-GUIDE = 4

**Appendix 5**

Following is the Python Code. We have also provided a separate model.py file in supplementary materials.

import streamlit as st

import pandas as pd

import joblib

from sklearn.preprocessing import MinMaxScaler, StandardScaler, LabelEncoder

def normalize_input(user_input, normalization_method, scaler=None, encoder=None):

normalized_input = {}

for feature, value in user_input.items():

if normalization_method == 'Min-Max':

normalized_input[feature] = scaler[feature].transform([[float(value)]])[0][0]

elifnormalization_method == 'Standardization':

normalized_input[feature] = scaler[feature].transform([[float(value)]])[0][0]

elifnormalization_method == 'One-Hot Encoding':

# Apply one-hot encoding using scikit-learn

df = pd.get_dummies(user_input[feature])

normalized_input.update(df)

elifnormalization_method == 'Label Encoding':

# Apply label encoding using scikit-learn

df = LabelEncoder().fit_transform(user_input[feature])

normalized_input[feature] = df

return pd.DataFrame([normalized_input], index=[0])

# Main Streamlit App

def main():

# Allow users to input their model path

model_path = st.text_input('Enter Model Path:')

if not model_path:

st.warning('Please provide a model path.')

st.stop()

# Allow users to input feature names

num_features = st.number_input('Enter the number of features:', min_value=1, value=6, step=1)

feature_names = [st.text_input(f'Enter Feature Name {i + 1}') for i in range(num_features)]

# Checkbox for Min-Max normalization

apply_min_max_norm = st.checkbox('Apply Min-Max Normalization')

if apply_min_max_norm:

min_max_scaler_path = st.text_input('Enter Min-Max Scaler Model Path:')

if not min_max_scaler_path:

st.warning('Please provide a Min-Max Scaler model path.')

st.stop()

min_max_scaler = joblib.load(min_max_scaler_path)

else:

min_max_scaler = None

# Checkbox for Standardization

apply_standardization = st.checkbox('Apply Standardization')

if apply_standardization:

standard_scaler_path = st.text_input('Enter Standard Scaler Model Path:')

if not standard_scaler_path:

st.warning('Please provide a Standard Scaler model path.')

st.stop()

standard_scaler = joblib.load(standard_scaler_path)

else:

standard_scaler = None

# Checkbox for One-Hot Encoding

apply_one_hot_encoding = st.checkbox('Apply One-Hot Encoding')

if apply_one_hot_encoding:

features_to_encode = st.multiselect('Select features for One-Hot Encoding', feature_names)

else:

features_to_encode = None

# Checkbox for Label Encoding

apply_label_encoding = st.checkbox('Apply Label Encoding')

if apply_label_encoding:

feature_to_label_encode = st.selectbox('Select feature for Label Encoding', feature_names)

else:

feature_to_label_encode = None

# Load the trained model

with open(model_path, 'rb') as model_file:

model = joblib.load(model_file)

st.title('Diabetes Prediction App')

# Collect user input using text boxes

user_input = {}

for feature in feature_names:

user_input[feature] = st.text_input(f'Enter {feature}', '20', key=f'user_input_{feature}')

# Normalise user input based on the selected techniques

normalized_input = None # Initialize normalized_input

if apply_min_max_norm:

normalized_input = normalize_input(user_input, 'Min-Max', scaler=min_max_scaler)

if apply_standardization:

normalized_input = normalize_input(user_input, 'Standardization', scaler=standard_scaler)

if apply_one_hot_encoding:

normalized_input = normalize_input(user_input, 'One-Hot Encoding')

if apply_label_encoding:

normalized_input = normalize_input(user_input, 'Label Encoding')

# Make predictions

if normalized_input is not None: # Check if normalized_input is defined

probabilities = model.predict_proba([normalized_input])[:, 1]

st.write('Disease Probability:', probabilities[0])

else:

st.write("Please Provide Data and Models")

if __name__ == "__main__":

main()

**Appendix 6**

| Models | Present Study  (A) | | | Published Literature  (B) | Variability with literature  (B-A)/A |
| --- | --- | --- | --- | --- | --- |
| AdaBoost Classifier | | 75.52 | 78.301, 75.322 | | -0.26% to +3.68% |
| DecisionTree Classifier | | 71.35 | 65.973, 66.104, 72.805, 75.656, 71.422 | | -7.54% to +6.03% |
| Logistic Regression | | 78.65 | 74.504, 75.327, 74.892 | | -5.28% to -4.23% |
| RandomForest Classifier | | 77.60 | 79.808,79.576, 80.849, 77.482 | | -0.15% to +4.18% |
| Support Vector Machine | | 77.08 | 75.004, 74.8010, 74.897, 74.022 | | -3.97% to -2.70% |

**Table A2**– Comparison of classification Accuracy of ML models developed in this study on Pima Indians Diabetes dataset to different machine learning methods published in the literature. *Numbers in the Brackets () in third column are the references to the respective studies. In the fourth column, negative percentages indicate that models developed using the ML-GUIDE software performed better compared to those published in the literature, while positive percentages indicate the opposite.*

**Appendix 7**

| **Feature** | **Library** | **Version** |
| --- | --- | --- |
| Machine Learning | Scikit-learn11 | 0.23 |
| Dataset | Pandas | 0.23.4 |
| Dataset view | PandasTable | 0.12.1 |
| Graphs | Matplotlib12 | 3.0.2 |
| GUI | ttkbootstrap | 0.5.1 |
| Programming Language | Python | 3.7.1 |
| Others | Numpy, Joblib | 1.15.4, 1.3.1 |

Table A3: Python programming libraries used to develop the ML-GUIDE software

**Appendix 8**

**Adaboost Classifier:**

The Adaboost algorithm, short for Adaptive Boosting, is an ensembling technique that sequentially incorporates a multitude of weak learners into a robust classifier. An iterative process assigns varying weights to instances, emphasising those that prove challenging to classify. The amalgamation of these weighted learners empowers the Adaboost classifier in making accurate diabetes predictions.

**Decision Tree Classifier:**

Decision trees perform the machine learning task (classification or Regression) by learning simple decision rules for prediction. The algorithm aims to learn these simple decision rules with the inference from the training data. All the predictions are then made based on these learned decision rules.

**Logistic Regression:**

Logistic Regression, a binary classification algorithm, operates through a mathematical function. This model is particularly skilled at categorising instances into two groups, such as diabetic and non-diabetic individuals. Logistic Regression uses the sigmoid function to transform data into a format suitable for binary classification. Logistic function given below is used to transform the output of linear equation into a sigmoid curve.

The value of y is calculated from a linear equation given below

**Random Forest Classifier:**

The random forest classifier functions as an intricate network of decision trees, each assessing a random subset of the dataset. By incorporating an element of randomness, the random forest mitigates the risk of overfitting, thereby delivering robust and dependable outcomes in diabetes prediction.

**Support Vector Classifier:**

Support vector machines perform the classification task by creating a decision boundary called a hyperplane between the data points representing different classes. SVM aims to construct this hyperplane so that it is at a maximum distance from the support vectors of both classes. This boundary's configuration is significantly influenced by support vectors—data points crucial for constructing the hyperplane—ensuring accurate predictions.

References

1 Dhilsath Fathima M, Justin Samuel S. Improved Adaboost Algorithm with Regression Imputation for Prediction of Chronic Type 2 Diabetes Mellitus. In: Sharma H, Gupta MK, Tomar GS, Lipo W, eds. Communication and Intelligent Systems. Singapore: Springer Singapore, 2021: 691–708.

2 Kumari S, Kumar D, Mittal M. An ensemble approach for classification and prediction of diabetes mellitus using soft voting classifier. *International Journal of Cognitive Computing in Engineering* 2021; **2**: 40–6.

3 Bozkurt MR, Yurtay N, Yilmaz Z, Sertkaya C. Comparison of different methods for determining diabetes. *Turk J Elec Eng & Comp Sci* 2014; **22**: 1044–55.

4 Chatrati SP, Hossain G, Goyal A, *et al.* Smart home health monitoring system for predicting type 2 diabetes and hypertension. *Journal of King Saud University - Computer and Information Sciences* 2022; **34**: 862–70.

5 Deng D, Kasabov N. On-line pattern analysis by evolving self-organizing maps. *Neurocomputing* 2003; **51**: 87–103.

6 Chang V, Bailey J, Xu QA, Sun Z. Pima Indians diabetes mellitus classification based on machine learning (ML) algorithms. *Neural Comput & Applic* 2023; **35**: 16157–73.

7 Rajendra P, Latifi S. Prediction of diabetes using logistic regression and ensemble techniques. *Computer Methods and Programs in Biomedicine Update* 2021; **1**: 100032.

8 Saxena R, Sharma SK, Gupta M, Sampada GC. A Novel Approach for Feature Selection and Classification of Diabetes Mellitus: Machine Learning Methods. *Computational Intelligence and Neuroscience* 2022; **2022**: 1–11.

9 Zou Q, Qu K, Luo Y, Yin D, Ju Y, Tang H. Predicting Diabetes Mellitus With Machine Learning Techniques. *Front Genet* 2018; **9**: 515.

10 Karthikeyani V, Parvin Begum I, Tajudin K, Shahina Begam I. Comparative of Data Mining Classification Algorithm (CDMCA) in Diabetes Disease Prediction. *IJCA* 2012; **60**: 26–31.

11 Pedregosa F, Varoquaux G, Gramfort A, *et al.* Scikit-learn: Machine Learning in Python. 2018; published online June 5. http://arxiv.org/abs/1201.0490 (accessed June 20, 2022).

12 Hunter JD. Matplotlib: A 2D Graphics Environment. *Comput Sci Eng* 2007; **9**: 90–5.
